# Supplementary material for: Facile synthesis of TaOxNy photocatalysts with enhanced visible photocatalytic activity
Source: Royal Society of Chemistry journal article supplement (doi:10.1039/c5ra23087j), 2015-12-21
Supplement: c5ra23087j1.pdf [file c5ra23087j1.pdf]

## SUPPLEMENTARY INFORMATION

### Facile synthesis of $\text{TaO}_x\text{N}_y$ photocatalyst with enhanced visible photocatalytic activity

Ying Wang,<sup>a</sup> Haiqiang Lu,<sup>\*a</sup> Yuanyang Wang,<sup>a</sup> Jianhao Qiu,<sup>a,b</sup> Jing Wen,<sup>a</sup> Kang Zhou,<sup>b</sup> Li Chen,<sup>a</sup> Guanglei Song<sup>a</sup> and Jianfeng Yao<sup>\*b</sup>

<sup>a</sup>School of Chemical and Biological Engineering, Taiyuan University of Science and Technology, Taiyuan 030024, China. E-mail: luhaiqiang-1900@163.com

<sup>b</sup>College of Chemical Engineering, Nanjing Forestry University, Nanjing 210037, China. E-mail: jfyao@njfu.edu.cn

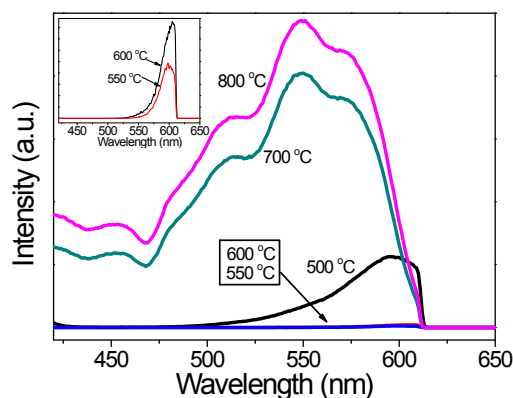

**Fig. S1** Photoluminescence spectra of  $\text{TaO}_x\text{N}_y$  samples sintered at 500-800 °C; excitation wavelength: 325nm.

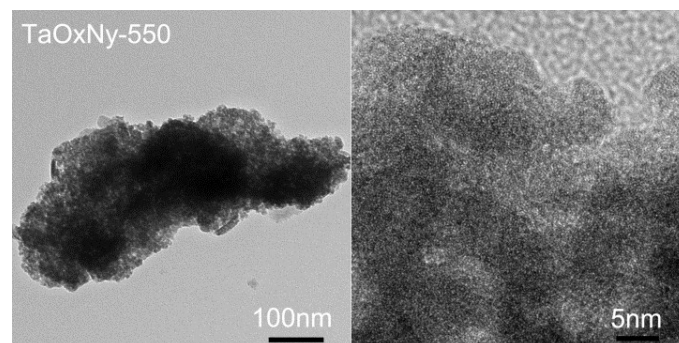

**Fig. S2.** TEM images of  $\text{TaO}_x\text{N}_y$ -550 sintered at 550 °C.

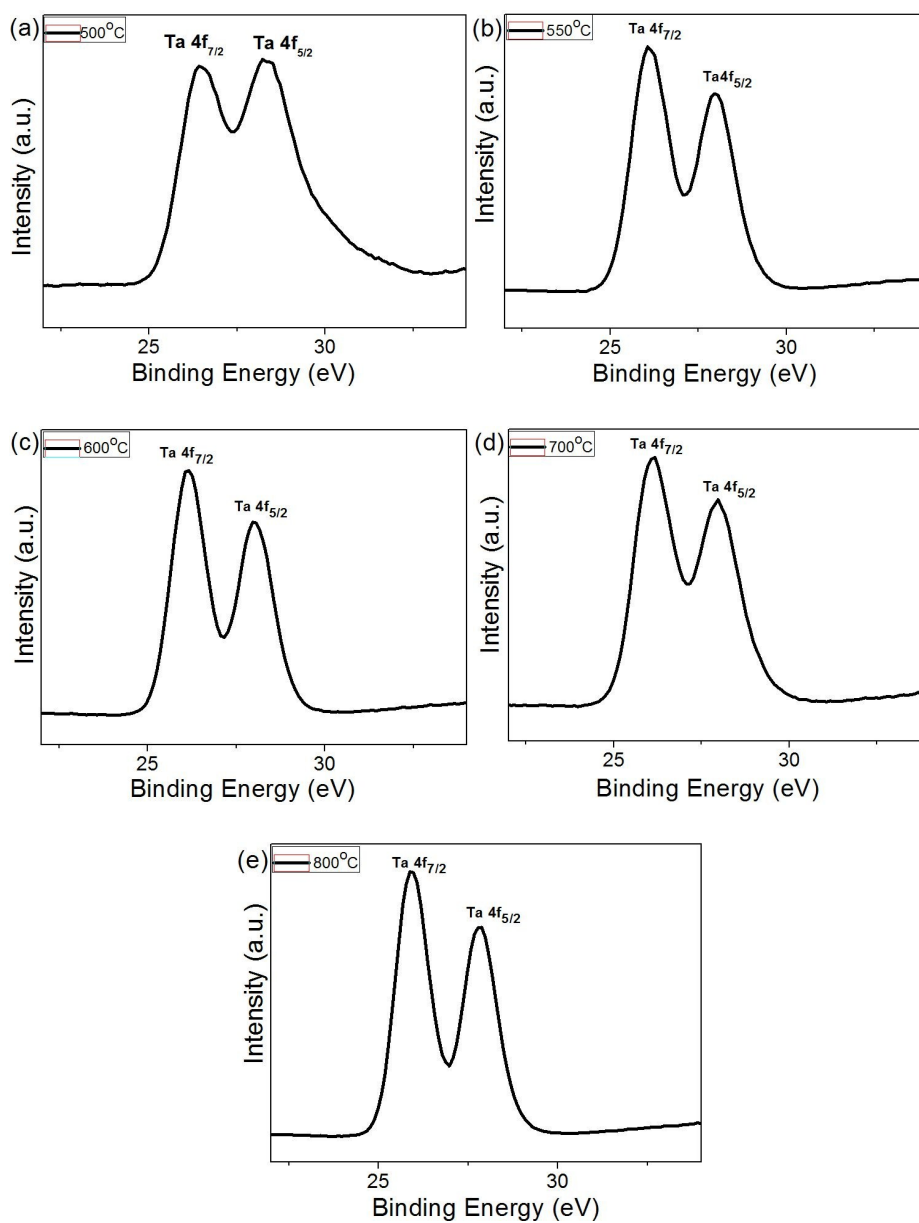

**Fig. S3.** XPS spectra of Ta (4f) of TaO<sub>x</sub>N<sub>y</sub> samples sintered at 500-800 °C.

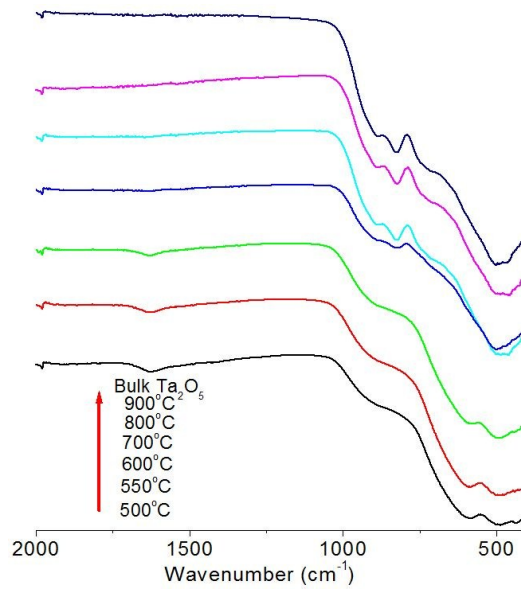

**Fig. S4.** FT-IR spectra of  $\text{TaO}_x\text{N}_y$  samples sintered at 500-900 °C.

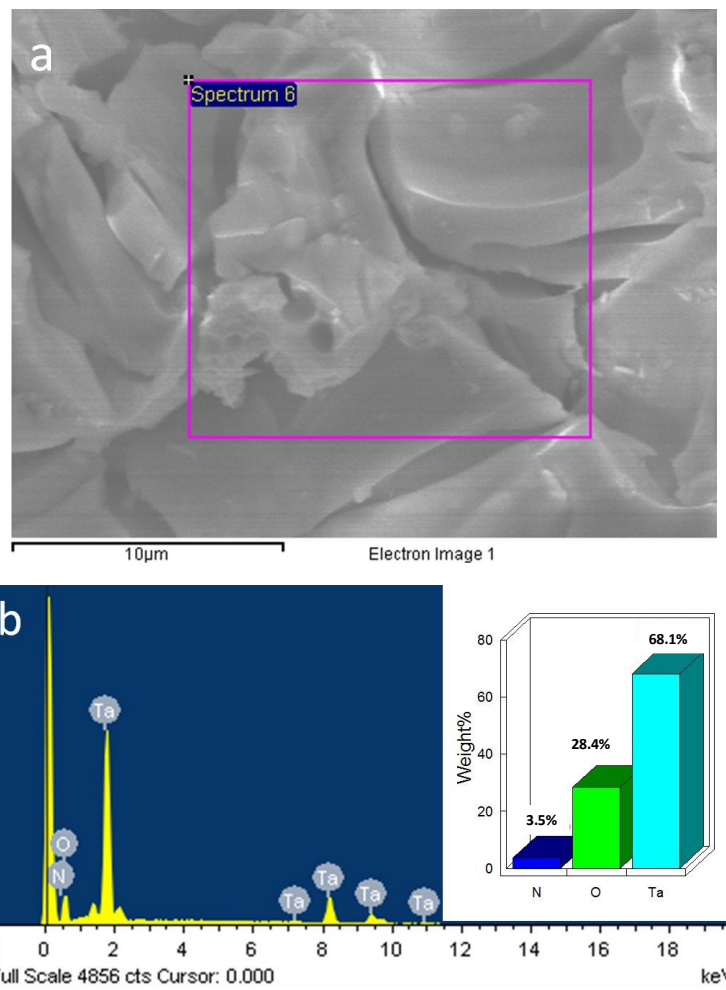

**Fig. S5.** SEM image (a) and EDAX spectrum (b) of  $\text{TaO}_x\text{N}_y$  sample sintered at 550°C.
